# Supplementary material for: Novel β-galactosidase nanobiocatalyst systems for application in the synthesis of bioactive galactosides
Source: Royal Society of Chemistry journal article supplement (doi:10.1039/c6ra20409k), 2016-01-01

### Figure captions

ESI Figure 1. FTIR spectra of FNS, AFNS and CCAFNS particles.

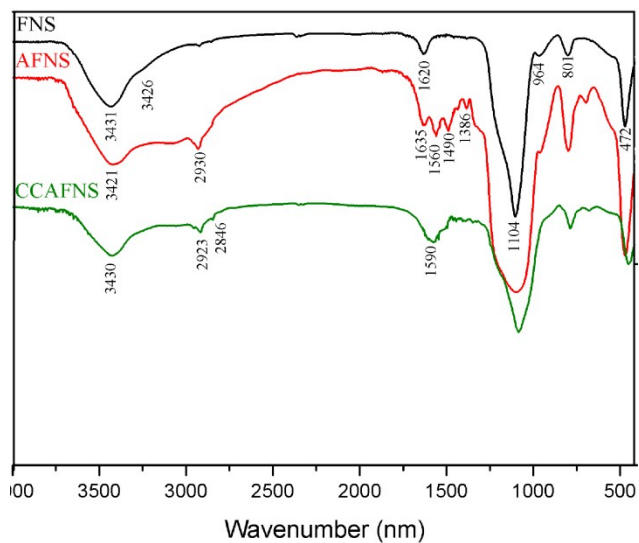

ESI Figure 2. TGA analysis of FNS, AFNS and CCAFNS particles.

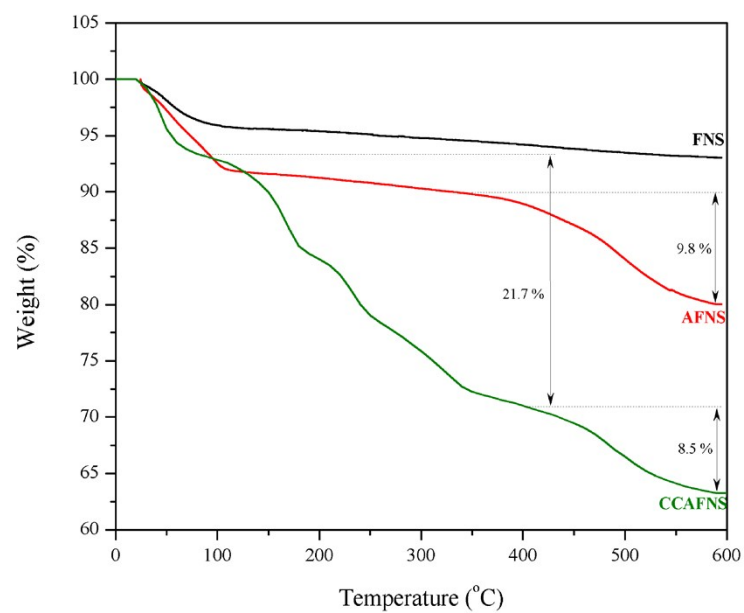

Supplement: c6ra20409k1.pdf [file c6ra20409k1.pdf]
